1 **Transcriptome analysis reveals the difference between “healthy” and “common” aging and their**  
2 **connection with age-related diseases**

3 **Characterizing human healthy aging gene expression**

4 Lu Zeng<sup>1</sup>, Jialiang Yang<sup>1</sup>, Shouneng Peng<sup>1</sup>, Jun Zhu<sup>1</sup>, Bin Zhang<sup>1</sup>, Yousin Suh<sup>2</sup>, Zhidong Tu<sup>1\*</sup>

5 <sup>1</sup>Department of Genetics and Genomic Sciences, Icahn School of Medicine at Mount Sinai, NY.

6 <sup>2</sup>Departments of Genetics and Medicine, Albert Einstein College of Medicine, NY.

7 \*Correspondence: zhidong.tu@mssm.edu

8 **Abstract**

9 A key goal of aging research is to understand mechanisms underlying healthy aging and use them to develop  
10 methods to promote the human healthspan. One approach is to identify gene regulations differentiating  
11 healthy aging from aging in the general population (i.e., “common” aging). In this study, we leveraged  
12 GTEx (Genotype-Tissue Expression) project data to investigate “healthy” and “common” aging in humans  
13 and their interconnection with diseases.

14  
15 We selected GTEx donors who were not annotated with diseases to approximate a “healthy” aging cohort.  
16 We then compared the age-associated genes derived from this cohort with age-associated genes from our  
17 “common” aging cohort which included all GTEx donors; we also compared the “healthy” and “common”  
18 aging gene expressions with various disease-associated gene expression to elucidate the relationships  
19 among “healthy”, “common” aging and disease. Our analyses showed that 1. “healthy” and “common”  
20 aging shared a large number of gene regulations; 2. Despite the substantial commonality, “healthy” and  
21 “common” aging genes also showed distinct function enrichment, and “common” aging genes had a higher  
22 enrichment for disease genes; 3. Disease-associated gene regulations were overall different from aging gene  
23 regulations. However, for genes regulated by both, their regulation directions were largely consistent,  
24 implying some aging processes could increase the susceptibility to disease development; and 4. Possible  
25 protective mechanisms were associated with the “healthy” aging gene regulations.

26

1 In summary, our work highlights several unique features of human “healthy” aging program. This new  
2 knowledge can be used for the development of therapeutics to promote human healthspan.

3

4 **Keywords:** Human aging signatures, gene expression, healthy aging, common aging, GTEx, age-related  
5 diseases.

6

## 1 **Introduction**

2 Human life expectancy has increased by more than 30 years in the past 165 years in developed countries  
3 like the US (Christensen et al. 2009). By 2050, two billion of the estimated nine billion people on earth will  
4 be older than 60 (Burch et al. 2014). Aging is the major risk factor for many age-related diseases, including  
5 cancers, metabolic diseases, neurodegenerative diseases, and cardiovascular diseases (Johnson et al. 2015).  
6 The prevalence of age-related comorbidity is high, as over 80% of the elderly population having at least  
7 one chronic diseases (CDC 2011). Helping this 80% of the aging population to live with improved health  
8 condition has become a major task for human aging and geroscience research, which can have major impact  
9 to socioeconomics and humanity.

10  
11 It remains elusive why the fortunate 20% of individuals above 65 years of age can live without any major  
12 health issues while the rest majority have to endure one or more chronic course of illness. Since very long-  
13 lived individuals (e.g., centenarians) tend to have a lower incidence of chronic illness than those in their  
14 80s and 90s (Kheirbek et al. 2017), and longevity is heritable with an estimated heritability around 25%,  
15 this suggests that healthy aging is unlikely a random event, but that there are underlying biological  
16 mechanisms favorably interplayed with certain environmental factors. A key goal of aging and geroscience  
17 research is to reveal these mechanisms to identify effective methods to promote the human healthspan.

18  
19 Multiple approaches have been explored to achieve this goal. For example, studies have been performed to  
20 identify genetic factors associated with longevity which identified a few genes (such as *APOE* and *FOXO3*)  
21 that are considered reproducible (Yashin et al. 2018). It is somewhat surprising to see that many disease  
22 risk alleles' occurrences are not significantly different in centenarians versus control population, making it  
23 a reasonable hypothesis that some protective factors exist to counter the deleterious effect of the disease  
24 risk genes (Bergman et al. 2007). In addition to searching for these protective genetic factors, people have  
25 also hypothesized that healthy aging individuals maintain a favorable epigenetic profile and optimal gene

1 expression that are critical for longevity and disease prevention (Brooks-Wilson 2013). However, the exact  
2 epigenetic and gene expression profiles defining a healthy aging are still unknown.

3

4 Gene expression and other types of “omics” data have been widely used to study the process of aging  
5 (Edwards et al. 2007; Glass et al. 2013; Peters et al. 2015; Yang et al. 2015). For examples, epigenome and  
6 transcriptome landscapes with aging in mice have revealed widespread induction of inflammatory  
7 responses (Benayoun et al. 2019); likewise, the down-regulation of mitochondrial genes across human  
8 tissues has been widely reported (Glass et al. 2013; Yang et al. 2015). Studying transcriptomes across  
9 multiple species with varied lifespans has similarly revealed a potential role for gene expression regulation  
10 in contributing to longer lifespans (Ma et al. 2018). Multiple gene expression based aging hallmarks (Frenk  
11 and Houseley 2018) are in concordance with the well-known aging hallmarks summarized by Lopez-Otin  
12 et al (2013). In addition to gene expression, epigenetic clock of aging has also been developed based on  
13 DNA-methylation markers (Horvath and Raj 2018). These recent studies provide support that gene  
14 expression and epigenetic regulations can inform our understanding of human aging.

15  
16 Despite recent developments in transcriptomic and epigenetic aging research, limited studies have focused  
17 on understanding the processes involved in healthy human aging. To investigate how healthy aging is  
18 different from aging in the general population at a systems level, one approach is to profile tissues from a  
19 healthy aging cohort and compare these to the common aging population, to identify gene regulations  
20 specific to the healthy aging. However, obtaining essential tissues from healthy individuals is challenging  
21 for ethical and practical reasons. On the other hand, several large-scale human genomic datasets are  
22 available and can be repurposed for aging research. Here, we leveraged GTEx data (Consortium et al. 2017)  
23 to investigate the difference between “healthy” and “common” aging in humans and study their connection  
24 with diseases using a transcriptomic analysis.

25  
26 We selected GTEx donors who were not annotated with diseases to approximate a “healthy” cohort. We  
27 calculated age-associated gene expressions in this “healthy” cohort and compared it to age-associated genes

1 from the “common” cohort which included all GTEx donors. We also compared the “healthy” and  
2 “common” aging gene expression with various disease-associated gene expressions to elucidate the  
3 relationships among “healthy” aging, “common” aging, and diseases.

## 4 **Results**

### 5 **Data overview**

6 We obtained gene expression and genotype data from the GTEx V7 release and examined 46 tissues with  
7 over 80 samples per tissue type, for a total of 11,705 samples, covering 620 donors (Supplemental Table  
8 S1, 2, Supplemental Fig. S1).

9  
10 The GTEx data contained detailed information for each sample and donor, including the donor’s age, post-  
11 mortem interval (PMI), RNA integrity number (RIN) and additional information. GTEx donor ages were  
12 between 20 to 70 years, and donor PMI was defined as the time between death to the start of sample  
13 collection procedure. For each tissue sample, PMI was defined as the time spanning the window from the  
14 moment of death (or cessation of blood flow), until tissue stabilization and/or preservation takes place, with  
15 values ranging from 29 to 1,739 minutes (Supplemental Fig. S2 & Table S3). We used the sample PMI for  
16 majority of the tissues; while we used donor ischemia time for samples from 11 brain subregions, since  
17 GTEx did not contain sample ischemic time information for them (see Methods).

### 18 19 **The influence of PMI on age-associated gene identification is tissue-specific**

20 Previous studies reported that some genes’ expression continued to change after death in a tissue-specific  
21 manner (Ferreira et al. 2018). As the majority of the GTEx samples were post-mortem samples, some gene  
22 expression changes due to PMI could potentially interfere with our age-associated gene expression  
23 identification. To ensure that our age-associated gene identification will not be confounded by PMI, we  
24 started our analysis by evaluating the relationship between PMI and donor age. We observed a significant  
25 positive Pearson correlation between PMI and chronological age in adipose, tibial artery, tibial nerve,

1 skeletal muscle and whole blood (the correlation coefficients were between 0.008 to 0.010, and the  
2 Benjamini-Hochberg false discovery rate (FDR) ranged from  $2.52 \times 10^{-7}$  to  $2.77 \times 10^{-5}$ ). PMI showed no  
3 correlation with age in other tissues including all brain subregions, pituitary and terminal ileum, etc.  
4 (Supplemental Fig. S3a and Table S4). In contrast, RIN was negatively associated with age in most tissues,  
5 particularly in colon, arteries, esophagus and lung (Supplemental Fig. S3b and Table S4).

6  
7 To examine the influence of PMI on age-associated gene expression changes, we compared two linear  
8 regression models. In the first model, we only adjusted gene expression with sex, RIN, three genotype-  
9 based principal components (PCs) and gene expression PCs (see methods). In the second model, PMI was  
10 included as an extra covariate. For both regression models, we set FDR cut-off to 0.01 to select significant  
11 associations between gene expressions and age.

12  
13 Our results showed that correcting PMI had clear impact on age-associated gene identification in some  
14 tissues (Supplemental Fig. S4). Overall, we observed decreased number of age-associated genes in most  
15 tissues when we corrected for PMI (Supplemental Table S5). This pattern was particularly apparent in  
16 breast mammary, skin, whole blood, lung and adipose tissues. A few exceptions were prostate and minor  
17 salivary gland, in which more age-associated genes were found after the PMI correction. In general, for the  
18 46 tissue types we considered, tibial artery showed the largest number of genes associated with age (briefly  
19 called as aging genes) ( $n=8,709$ ), followed by aorta artery ( $n=5,826$ ), skeletal muscle ( $n=4,444$ ), nerve tibial  
20 ( $n=3,619$ ) and subcutaneous fat ( $n=3,812$ ). In contrast, very few aging genes were identified from brain –  
21 spinal cord ( $n=0$ ), brain – substantia nigra ( $n=0$ ), pituitary ( $n=1$ ), small intestine -terminal ileum ( $n=1$ ) and  
22 liver ( $n=7$ ) (Supplemental Table S5). The wide range and tissue specificity of the size of aging genes is  
23 consistent with our previous findings (Yang et al. 2015).

24  
25 **GTEX human aging signatures reasonably recapitulated aging genes from other independent studies**

26 To evaluate whether aging signatures derived from GTEX data were reproducible, we compared them to  
27 age-associated gene lists from five independent studies covering the following tissues: brain (Berchtold et

1 al. 2008), skin (Glass et al. 2013), adipose (Glass et al. 2013), blood (Lu et al. 2018), and lung (de Vries et  
2 al. 2017). For each tissue type, we calculated the significance of the overlaps between gene lists from  
3 published work and our gene sets.

4  
5 Age-associated gene lists generated from GTEx showed a significant overlap with genes identified from  
6 these independent studies. For example, in brain and lung tissues, more than 30% of our genes were found  
7 overlapped with other studies, with p-values of  $5.81 \times 10^{-176}$  and  $4.32 \times 10^{-59}$  respectively (Supplemental  
8 Table S6), suggesting the aging signatures from GTEx were comparable with the aging signatures from  
9 other independent studies.

10  
11 Interestingly, despite that fewer age-associated genes could be identified by PMI correction in four out of  
12 the five tissues, we consistently observed an increase of the overlap between independently identified aging  
13 genes and our aging genes in these four tissues, e.g., from 10.53% to 12.70% in blood, 29.30% to 37.04%  
14 in lung (Supplemental Table S6), suggesting that the correction of PMI could help increase the  
15 reproducibility and robustness of aging signature identification.

16  
17 **Determining “common” and “healthy” aging signatures**

18 A key goal of aging research is to study mechanisms underlying healthy aging and based on them to identify  
19 effective methods to promote human healthspan. However, our understanding of healthy aging is rather  
20 limited. Particularly, a clear understanding of healthy aging at the molecular level is yet to be established.  
21 For example, it remains to be studied at a systems level how healthy aging is different from common aging,  
22 as aging process is usually accompanied with various chronic diseases (Global Burden of Disease Study  
23 2015). One approach to study this is to collect tissue samples from a healthy aging cohort to identify age-  
24 associated gene regulations, and compare with general aging population to determine regulations that are  
25 unique to the healthy aging. By definition, a truly healthy individual does not die due to chronic diseases.  
26 To obtain essential tissues (liver, brain, heart etc.) from these healthy individuals, it is only possible if such  
27 donors experiences death due to some other cause, such as accidents, which could not be predicted. Prompt

1 tissue collection can therefore be challenging. On the other hand, evaluating existing human genomic data  
2 and repurposing them for aging research represents a convenient alternative, although the apparent  
3 limitation is that the original experiment was not ideally designed for studying aging and therefore might  
4 not provide measurements on many age-related traits. Since GTEx cohort contained donors annotated with  
5 and without chronic diseases, it represents a unique opportunity to allow us to understand the difference  
6 between “common” vs. “healthy” aging at a transcriptome level. For each donor, GTEx recorded the  
7 donor’s medical condition for 21 disease categories, e.g., ischemic heart disease, cerebrovascular disease,  
8 chronic respiratory disease, diabetes mellitus type II and hypertension. We mapped these disease categories  
9 to their biologically relevant tissues, such as various lung diseases to the lung tissue; diabetes and obesity  
10 to the adipose tissue. In addition, we required a tissue to have a relatively large number of aging genes, and  
11 the sample size of disease donors to be relatively large (>20% of all tissue samples). Based on these criteria,  
12 subcutaneous fat, tibial artery, aorta artery and lung tissues were selected for further study regarding the  
13 difference between “healthy” and “common” aging.

14  
15 Initially, we defined “common” aging signatures as gene expression changes associated with age in the  
16 general GTEx cohort, for which we included all the donors regardless of their disease status (“common”  
17 cohort). Since this “common” cohort contains individuals annotated with and without chronic diseases, we  
18 used them to approximate the general aging population in the society. The “healthy” aging signature was  
19 defined as gene expression changes associated with age in the GTEx cohort excluding individuals annotated  
20 with tissue-specific diseases (“healthy” cohort). For example, for subcutaneous fat, the “common” aging  
21 signatures were calculated from all subcutaneous fat (total n=385), while the “healthy” aging signatures  
22 were identified from donors without type 2 diabetes and whose Body Mass Indexes (BMIs) were <30,  
23 which resulted in 236 samples (Fig. 1a). In tibial artery (total n=382), the “healthy” cohort (n=292) was  
24 obtained from GTEx donors without ischemic heart disease/heart attack/acute coronary syndrome. In lung  
25 (total n=379), the “healthy” cohort (n=257) was obtained from donors without chronic respiratory diseases,  
26 asthma or pneumonia (details can be seen in Supplemental Table S7). A linear regression model was then  
27 applied to identify aging genes in each of the aging cohorts (equation 2).



1 It is of note that the “healthy” cohort in this study is more defined at a “healthy” tissue-level rather than a  
2 cohort of individuals free of any diseases. For instance, the “healthy” cohort extracted from subcutaneous  
3 fat could contain individuals with ischemic heart disease, asthma or chronic obstructive pulmonary disease  
4 (COPD). Although theoretically it is ideal to remove individuals annotated with any disease types to obtain  
5 a better defined “healthy” cohort, this is not a good option with current GTEx data release since very few  
6 samples would be left after this procedure, which could significantly reduce the statistical power of  
7 identifying age-associated genes. For instance, only 65 out of 385 samples would remain for subcutaneous  
8 fat, and 48 out of 379 samples would remain for lung tissue if we removed all the donors annotated with  
9 one or more diseases. Due to this sample size limitation, we chose to approximate our “healthy” cohort in  
10 such a tissue-specific way.

11

## 12 **Differentially expressed genes from GTEx “healthy” vs. “disease” cohorts were reproducible in other** 13 **disease-focused transcriptomic studies**

14 As we divided samples based on donor’s disease condition, it is unclear if such division into “healthy” and  
15 “common” aging cohorts are biological meaningful. To validate our cohort separation, we calculated the  
16 differentially expressed genes (DEGs) between the “healthy” individuals and disease individuals, i.e., we  
17 compared 236 “healthy” individuals vs. 149 disease individuals in subcutaneous fat, 292 “healthy”  
18 individuals vs. 90 disease individuals in tibial artery, 198 “healthy” individuals vs. 69 disease individuals  
19 in aorta artery, and 257 “healthy” individuals vs. 122 disease individuals in lung tissue. By using limma-  
20 voom (Ritchie et al. 2015), we acquired 2,137 DEGs from subcutaneous fat, 436 DEGs from tibial artery,  
21 1,025 DEGs from lung, while no DEGs were identified from aorta artery. This may be due to the small size  
22 of disease samples or other factors such as high heterogeneity in gene expression associated with disease  
23 subgroups. We therefore removed aorta artery from the DEG-related analysis (Supplemental Table S7). We  
24 then computed the significance of the overlap between our DEGs and disease-related gene signatures  
25 obtained from other studies.

26

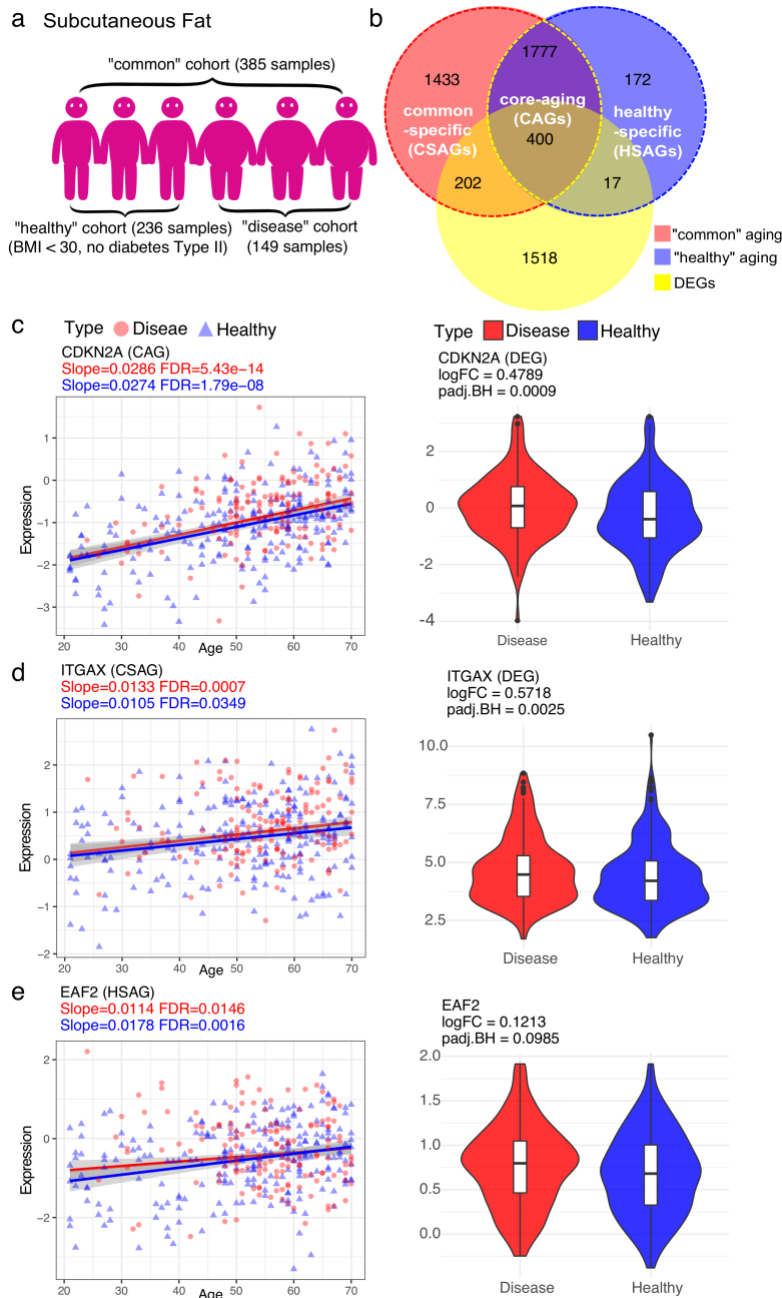

1  
2 **Fig. 1. Examples of age-associated gene expression changes in GTEx subcutaneous fat.** **a** Cartoon illustration of  
3 separating donors into “healthy”, “common” and “disease” cohorts. **b** Venn diagram shows the relationship among  
4 “common” aging signature identified from the “common” cohort, “healthy” aging signature from the “healthy” cohort,  
5 and DEGs calculated between the “healthy” cohort and the “disease” cohort in subcutaneous fat. **c,d,e** Scatter plots  
6 show 3 representative age-associated gene expression patterns in three gene sets (from top to bottom: “core-aging  
7 genes”, “common-specific aging genes”, or “healthy-specific aging genes”). The red line and red dots denote the  
8 regression line and samples from the “common” cohort, similarly, the blue line and blue dots represent the regression  
9 line and samples from the “healthy” cohort. Violin plots show the gene expression differences between the “healthy”  
10 cohort and the “disease” cohort for the corresponding genes in scatter plots. Red violin plot is the gene expression in  
11 the “disease” cohort; blue violin plot shows the gene expression in the “healthy” cohort.

1  
2 Our results showed that DEGs from GTEx significantly overlapped with disease signatures from prior  
3 independent studies in the corresponding tissues (Supplementary Table S8). For example, Soronen et al.  
4 (Soronon et al. 2012) reported 148 insulin resistance related genes from subcutaneous adipose tissue, 81 of  
5 which overlapped with GTEx DEGs in subcutaneous fat, with a p-value of  $1.23 \times 10^{-42}$ . These DEGs showed  
6 no significant overlap enrichment in artery or lung, suggesting the disease-associated genes were highly  
7 tissue-specific. Similarly, genes associated with coronary heart disease (CHD) identified from peripheral  
8 whole blood (Joehanes et al. 2013) were exclusively enriched for GTEx tibial artery DEGs (p-value=0.03).  
9 Obesity related genes obtained from fat (Font-Clos et al. 2017) were overrepresented only in DEGs from  
10 subcutaneous fat and lung (p-values= $7.90 \times 10^{-4}$  and  $2.28 \times 10^{-3}$ ), but not in tibial artery. Genes involved in  
11 chronic obstructive pulmonary disease (COPD) detected from lung (Wang et al. 2008) were found strongly  
12 enriched for our GTEx lung DEGs (p-value= $5.79 \times 10^{-4}$ ), while not in other tissue types. Together, these  
13 comparisons indicated that our separation of “healthy” and “disease” individuals based on the GTEx donor  
14 health information for the corresponding tissue types was biologically meaningful.

15  
16 **Characterizing “healthy” and “common” aging signatures suggests some “common” aging genes**  
17 **could be driven by diseases while “healthy” aging signature contained some protective genes**

18 To compare “healthy” and “common” aging signatures, we divided them into three groups: aging genes  
19 only seen in the “common” cohort (“common-specific aging genes”, CSAGs), aging genes only observed  
20 in the “healthy” cohort (“healthy-specific aging genes”, HSAGs), and common aging genes identified from  
21 both cohorts (“core-aging genes”, CAGs). In general, we observed a large overlap between “common” and  
22 “healthy” aging signatures in all the four tissues we inspected. For example, in subcutaneous fat, 3,812  
23 “common” aging genes overlapped with 2,366 “healthy” aging genes by 2,177 genes (Fig. 1b and  
24 Supplemental Table S7), suggesting that although “healthy” aging is different from “common” aging, they  
25 do share a large number of gene expression regulations. In other words, there exists a core aging program  
26 regardless the health status of the aging individuals.

27

1 We provided examples of gene regulation for CAGs, CSAGs, and HSAGs in Fig. 1. As an example of  
2 CSAGs, the expression of integrin subunit alpha X (*ITGAX*) was significantly positively correlated with  
3 age in subcutaneous fat in the “common” cohort ( $FDR=7.12\times 10^{-4}$ ), while its association with age was much  
4 less significant in the “healthy” cohort ( $FDR=0.03$ ) (Fig. 1d). *ITGAX* encodes the integrin alpha X chain  
5 protein (also named CD11c), which forms a leukocyte-specific integrin when combined with the beta 2  
6 chain (*ITGB2*). Previous studies reported that CD11c expression in adipose tissue significantly increased  
7 in both diet-induced obesity mice and humans (Wu et al. 2010). This is consistent with our results as *ITGAX*  
8 was up-regulated in GTEx adipose tissues of donors with high BMIs and type 2 diabetes (Fig. 2d). Since  
9 this gene had a positive correlation with age in the “common” cohort but not so when disease individuals  
10 were removed, it indicates that its association with age in the “common” cohort was partially driven by the  
11 disease individuals. As can be seen in Fig. 1a, over 1,600 CSAGs were identified in the subcutaneous fat,  
12 and more than 200 of them were disease DEGs, suggesting that many aging genes derived from the  
13 “common” cohort could be partially driven by disease. In contrast, as an example of HSAGs, gene  
14 expression changes of ELL-associated factor 2 (*EAF2*) showed strong up-regulation with age  
15 ( $FDR=1.58\times 10^{-3}$ ) in the “healthy” cohort (Fig. 1e), but to a less degree in the “common” cohort  
16 ( $FDR=0.015$ ). *EAF2* gene was found to regulate DNA repair and provide protection to DNA damage in  
17 prostate cancer cells (Ai et al. 2017). Lastly, for CAGs, the expression changes of cyclin dependent kinase  
18 inhibitor 2A (*CDKN2A*) was substantially associated with age ( $FDR=5.43\times 10^{-14}$  and  $1.79\times 10^{-8}$ ) in both  
19 cohorts (Fig. 1c). *CDKN2A* encodes for INK4 family member p16 (or p16<sup>INK4a</sup>) which is a well-recognized  
20 cell senescence marker (Coppé et al. 2011). The increased expression of *CDKN2A* has been suggested as a  
21 biomarker of physiological age (Krishnamurthy et al. 2004).

22  
23 In addition to having different age-association for their gene expressions, we found that CAGs and CSAGs  
24 had significant higher overlap with disease-associated DEGs compared to HSAGs. As shown for  
25 subcutaneous fat (Fig. 1b), 400 and 202 genes from CAGs and CSAGs were disease associated DEGs (p-  
26 values= $5.40\times 10^{-3}$  and  $1.36\times 10^{-32}$ , respectively, Supplemental Table S9.). In contrast, only 17 disease DEGs  
27 overlapped with HSAGs (p-value=0.78). Similarly, CAGs from tibial artery were specially enriched for its

1 disease DEGs ( $p\text{-value}=9.73\times 10^{-10}$ ), and lung CSAGs were also overrepresented in lung disease associated  
2 DEGs ( $p\text{-value}=3.09\times 10^{-11}$ ). While HSAGs were found much less significantly enriched for disease DEGs  
3 in tibial artery ( $p\text{-value}=0.03$ ) and lung ( $p\text{-value}=1.00$ ).

4

## 5 **The direction of aging gene expression is largely consistent with the regulation direction in age-** 6 **related diseases**

7 One key question in geroscience is to understand the underlying mechanisms why aging dramatically  
8 increases the incidence of various age-related diseases. Since we had obtained aging signatures from both  
9 “healthy” and “common” cohorts, and signatures associated with several diseases, we examined the  
10 relationships between “healthy”, “common” aging and disease.

11

12 We compared different aging signatures with 7 disease signatures, 4 from previous independent studies  
13 (insulin resistance related, obesity related, CHD and COPD) and 3 from DEGs calculated from GTEx data.  
14 We observed that most of the disease DEGs were not genes in our aging signatures (Supplemental Table  
15 S10). Using insulin resistance/obesity related DEGs in subcutaneous fat as an example, over 60% of them  
16 were not associated with age. Furthermore, as previously noticed, “healthy” aging was less enriched for  
17 disease DEGs compared with “common” aging. For example, in subcutaneous fat, 36% of “common” aging  
18 signatures were found as insulin resistance DEGs, while only 27% of “healthy” aging signatures were  
19 insulin resistance DEGs (Fig. 2a).

20

21 Although disease and aging signatures were largely different, a substantial number of gene expression  
22 regulations were common between them. We considered it interesting to test if age-associated gene  
23 expression (particularly in the “healthy” aging) would have similar directions as the regulation changes in  
24 disease conditions. We decided to focus on the “healthy” aging since the “common” aging cohort contained  
25 disease individuals, therefore the “common” aging genes were not defined independently from disease-  
26 associated gene regulations. On the other hand, “healthy” aging genes were identified from the “healthy”  
27 cohort, which were considered disjoint from the disease DEGs detected from the “disease” cohort. Our

1 results showed that in most cases, the direction of aging gene regulation in “healthy” aging was largely  
2 consistent with the direction of gene expression changes in disease (Fig. 2b&c). Using FERM domain  
3 containing 4B (*FRMD4B*) in subcutaneous fat as an example, it was an insulin resistance DEG (also a  
4 disease DEG in our GTEx analysis). It is an inflammation-related gene whose expression was up-regulated  
5 in the adipose tissue in insulin resistant compared to insulin sensitive group (Wiklund et al. 2016). Our  
6 results also showed that the gene expression of *FRMD4B* was up-regulated with increasing age and in  
7 disease condition. This consistency suggests that even under “healthy” aging condition, some genes’  
8 regulation is towards a direction that transforms the tissue into a more disease-prone state.

9  
10 While the direction of gene expression regulation is largely consistent between “healthy” and disease  
11 signatures, some gene regulations showed opposite directions of regulation (Fig. 2d). For example,  
12 malonyl-CoA-Acyl carrier protein transacylase (*MCAT*), a gene related to pathways like fatty acid  
13 metabolism and mitochondrial fatty acid beta-oxidation, its gene expression was found negatively  
14 correlated to plasma HDL levels (Ma et al. 2007). In GTEx data, *MCAT* showed a down-regulation in  
15 “healthy” aging but its expression was up-regulated in disease population in the tibial artery, suggesting  
16 this gene could play a protective role in “healthy” aging to counter the deleterious effect of other disease  
17 risk genes.

18

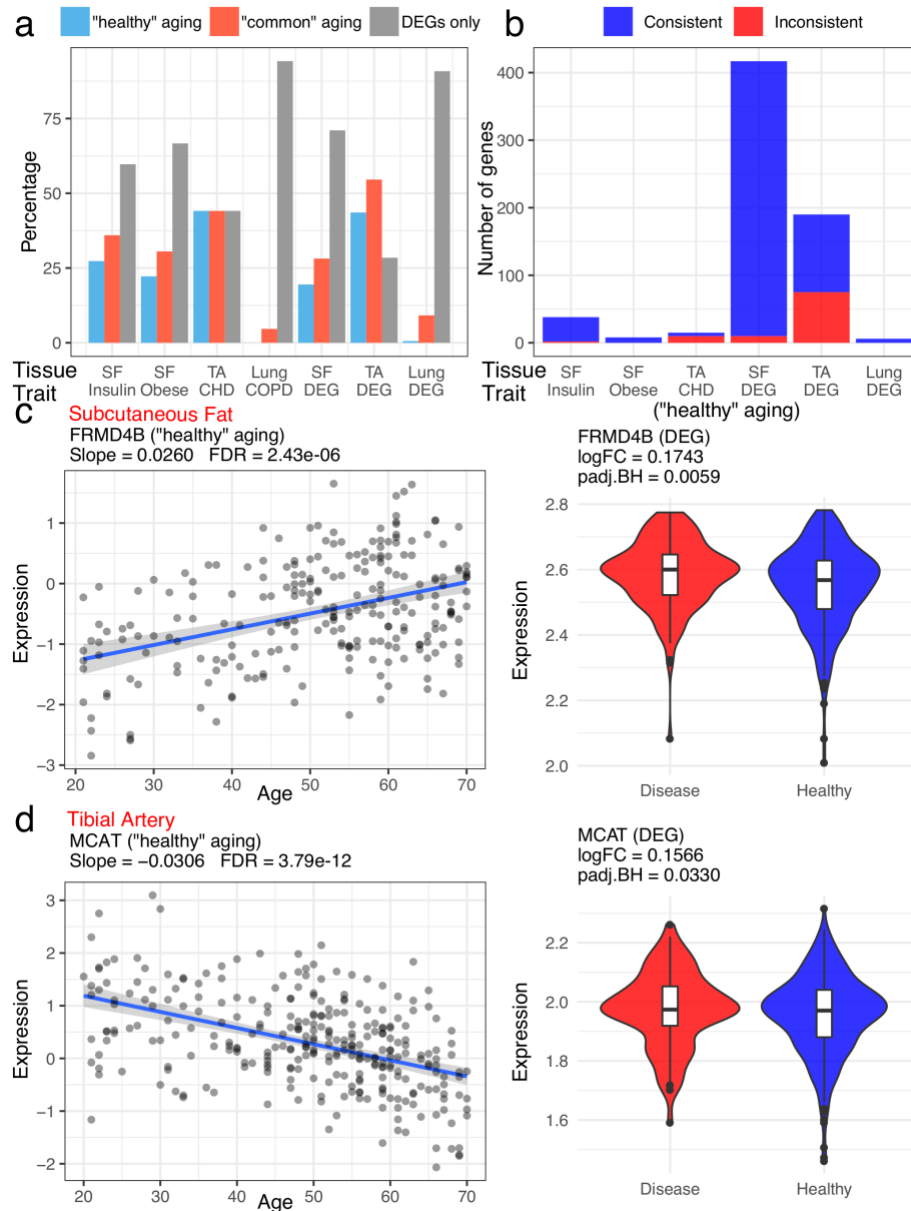

1  
2 **Fig 2. The relationship between age-associated vs. disease-associated gene expression changes.** a. The percentage  
3 of aging signatures (blue: "healthy" aging; red: "common" aging) that overlapped between disease DEGs and the  
4 percentage of disease DEGs that were not associated with age (grey bars). Disease DEGs were 4 disease signatures  
5 from prior work (insulin, obesity, coronary heart disease (CHD), and chronic obstructive pulmonary disease (COPD)  
6 related DEGs) and 3 disease DEGs based on GTEx analysis (simply labeled as DEG). The tissues plotted were  
7 subcutaneous fat (SF), tibial artery (TA), and lung. **b** The number of "healthy" aging signatures whose direction was  
8 consistent (blue) or inconsistent (red) with the direction of gene regulations in 6 disease DEGs as in **a** (there was no  
9 overlapped genes between COPD and "healthy" aging genes in lung). **c, d** Two examples of gene expression patterns  
10 for "healthy" aging genes. **c**: "Healthy" aging in subcutaneous fat showed the same direction of gene expression  
11 change with disease DEG, **d**: "healthy" aging in tibial artery showed an opposite direction of gene expression change  
12 with disease DEG. The regression was based on the "healthy" cohort. Violin plots show the gene expression  
13 differences between "healthy" (blue) and "disease" (red) individuals.

## 1 **Difference in functional enrichment between “healthy” and “common” aging signatures**

2 We investigated the function similarity and difference between “healthy” and “common” aging signatures  
3 using DAVID tools (Dennis et al. 2003). Genes were divided into up-regulated vs. down-regulated genes  
4 with respect to age and were annotated separately (Supplemental Table S11).

5  
6 GO annotations and pathway analysis revealed differential regulation of genes involved in CAGs, CSAGs  
7 and HSAGs. Among genes down-regulated with age, subcutaneous fat CAGs and CSAGs and tibial artery  
8 CAGs were characterized with changes in mitochondrial function, energy/oxidation derivation, TCA cycle  
9 and genes associated with several neurodegenerative diseases. The cumulative damage to mitochondria and  
10 mitochondrial DNA caused by reactive oxygen species is a well-recognized cause of aging (Cui et al. 2012).  
11 Down-regulated HSAGs in tibial artery were mainly related to ribosome, various kinds of RNA processing  
12 and the regulation of translation; Down-regulated CSAGs in lung were found to be involved in cell-cycle  
13 among the top differentially expressed GO terms, while no functional enrichments were found in lung  
14 HSAGs (Fig. 3, supplementary Table S12).

15  
16 Genes up-regulated with age were enriched for a set of different functions compared with genes down-  
17 regulated with age (Fig. 3). For example, CAGs in subcutaneous fat were characterized for response to  
18 immune/defense/inflammatory, T cell receptor signaling pathway and chemokine signaling pathway, and  
19 it was reported that aging is associated with increased T-cell chemokine expression (Chen et al. 2003). Up-  
20 regulated CAGs in tibial artery were enriched for similar functions as adipose tissue, in addition, they were  
21 also found to be associated with intestinal immune network for IgA production, MHC protein complex and  
22 various pathologies. Very few functions were found in up-regulated CSAGs and HSAGs, and they were  
23 mostly associated with extracellular component (A full list of functional annotations is provided in  
24 Supplemental Table S12).

25



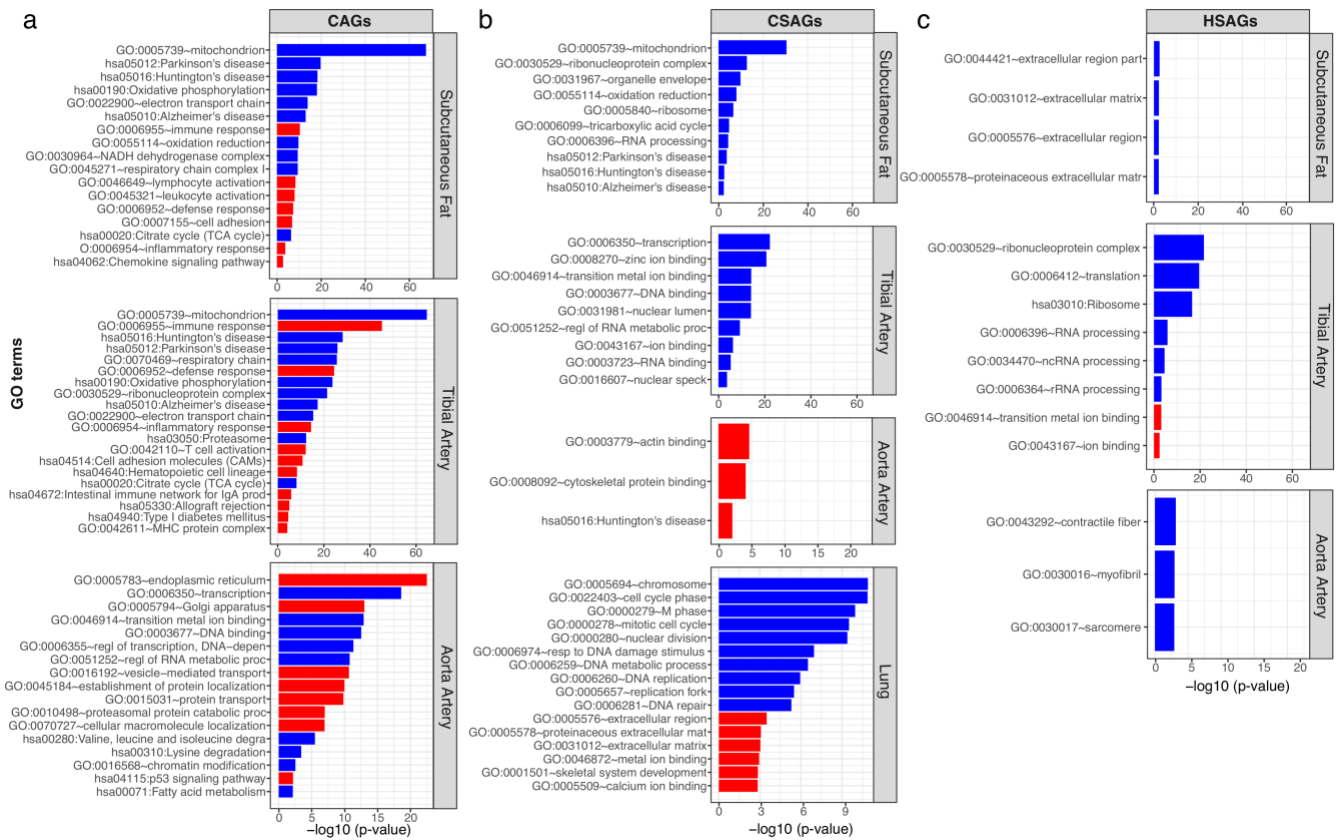

1  
2 **Fig. 3. Function enrichment of the “core-aging genes”, “common-specific aging genes” and “healthy-specific**  
3 **aging genes”. a.** GO terms and KEGG pathways enriched in the CAGs in three tissues (from top to bottom:  
4 subcutaneous fat, tibial artery and aorta artery). **b.** GO terms and KEGG pathways enriched in the CSAGs in four  
5 tissues (from top to bottom: subcutaneous fat, tibial artery, aorta artery and lung). **c.** GO terms and KEGG pathways  
6 enriched in the HSAGs in three tissues (from top to bottom: subcutaneous fat, tibial artery and aorta artery). The red  
7 bars denote up-regulated genes with age, the blue bars represent down-regulated genes with age.

8  
9 **Link GTEx age-associated gene expression with known disease and human age genes**

10 Previously, we compiled a list of disease genes for 277 diseases/traits based on the NIH Genome-wide  
11 association study (GWAS) catalog (Welter et al. 2014) and Online Mendelian Inheritance in Man (OMIM)  
12 (Amberger et al. 2015)(see Methods for details). Using this combined gene list, we investigated the disease  
13 gene enrichment for CAGs, CSAGs and HSAGs in four tissues, considering the age-associated up- and  
14 down-regulated genes separately. To visualize the results, we displayed the top 10 disease/traits that had  
15 significant enrichment in at least one type of age-associated genes for each tissue in Fig. 4. A total of 75

1 unique diseases/traits with significant overrepresented in down-regulated aging signatures, and 74 unique  
2 diseases/traits with significant overrepresented in up-regulated aging signatures were displayed (Fig. 4).

3 We found that disease gene enrichment for “healthy” and “common” aging signatures varied in a tissue-  
4 specific manner. For the up-regulated aging genes, most of the significant disease enrichment was observed  
5 in either CAGs or CSAGs and to a lesser degree in the HSAGs (Fig. 4a). For example, in tibial artery,  
6 CAGs were found to be strongly associated with multiple bowel diseases, including ulcerative colitis,  
7 inflammatory bowel disease, crohn’s disease and celiac disease, but very few enrichments were observed  
8 for the HSAGs. One of the top up-regulated CAGs in tibial artery, *EDA2R* (FDR=7.67×10<sup>-30</sup>), was  
9 considered as a strong candidate gene for lung aging (de Vries et al. 2017).

10 For genes decreased with chronological age, we generally observed more significant overlaps with various  
11 disease traits for all types of aging genes, including the HSAGs (Fig. 4b). For example, in the tibial artery,  
12 the HSAGs were significantly enriched for genes associated with hypertension (p-value=1.88×10<sup>-3</sup>); but the  
13 enrichment was not observed for the CAGs (p-value=0.82) or CSAGs (p-value=0.57). This is not totally  
14 surprising for HSAGs, since down-regulation of such disease-associated gene expression could be  
15 beneficial to the healthy aging. Overall, the disease gene enrichment analysis suggests differential  
16 regulation of disease genes (fewer up-regulated genes while more down-regulation) with respect to  
17 “common” and “healthy” aging.

18 Last but not least, we tested the enrichment of literature curated candidate human aging genes with respect  
19 to “healthy” and “common” aging signatures. 307 candidate human age genes were downloaded from  
20 GenAge (de Magalhaes and Toussaint 2004). We then calculated the overlap enrichment with three aging  
21 gene sets (Table 1). Our results showed that CAGs in subcutaneous fat and aorta artery were enriched for  
22 human aging genes from GenAge (p-value < 0.01), while neither the CSAGs or HSAGs were enriched for  
23 them.

24

25

26

1 **Table 1. Comparison of three aging signatures with human aging genes from GenAge.**

2 We compared “core-aging genes”, “common-specific aging genes” and “healthy-specific aging genes” from  
 3 subcutaneous fat, aorta artery, tibial artery and lung with human aging genes from GenAge. No. of background genes  
 4 was set as the number of all genes we used to calculate age-associated genes in each tissue; No. of GenAge contains  
 5 the number of overlapped genes between GenAge and our background genes vs. the total number of original GenAge  
 6 genes; p-value was calculated by Fisher’s exact test.

| Tissue           |                         | GenAge     |                 |                  |
|------------------|-------------------------|------------|-----------------|------------------|
|                  |                         | Core-aging | Common-specific | Healthy-specific |
| Subcutaneous Fat | No. of background genes | 18,643     |                 |                  |
|                  | No. of GenAge genes     | 282/307    |                 |                  |
|                  | No. of aging genes      | 2,177      | 1,635           | 189              |
|                  | No. of overlapped genes | 54         | 24              | 3                |
|                  | p-value                 | 0.0002     | 0.5927          | 0.5470           |
| Aorta Artery     | No. of background genes | 18,189     |                 |                  |
|                  | No. of GenAge genes     | 281/307    |                 |                  |
|                  | No. of aging genes      | 4,321      | 1,505           | 389              |
|                  | No. of overlapped genes | 91         | 24              | 10               |
|                  | p-value                 | 0.0006     | 0.4666          | 0.0807           |
| Tibial Artery    | No. of background genes | 17,708     |                 |                  |
|                  | No. of GenAge genes     | 278/307    |                 |                  |
|                  | No. of aging genes      | 5,488      | 3,221           | 2,686            |
|                  | No. of overlapped genes | 92         | 53              | 28               |
|                  | p-value                 | 0.2412     | 0.3754          | 0.9952           |
| Lung             | No. of background genes | 19,540     |                 |                  |
|                  | No. of GenAge genes     | 285/307    |                 |                  |
|                  | No. of aging genes      | 96         | 884             | 11               |
|                  | No. of overlapped genes | 1          | 22              | 0                |
|                  | p-value                 | 0.7568     | 0.0106          | 1.0000           |

7

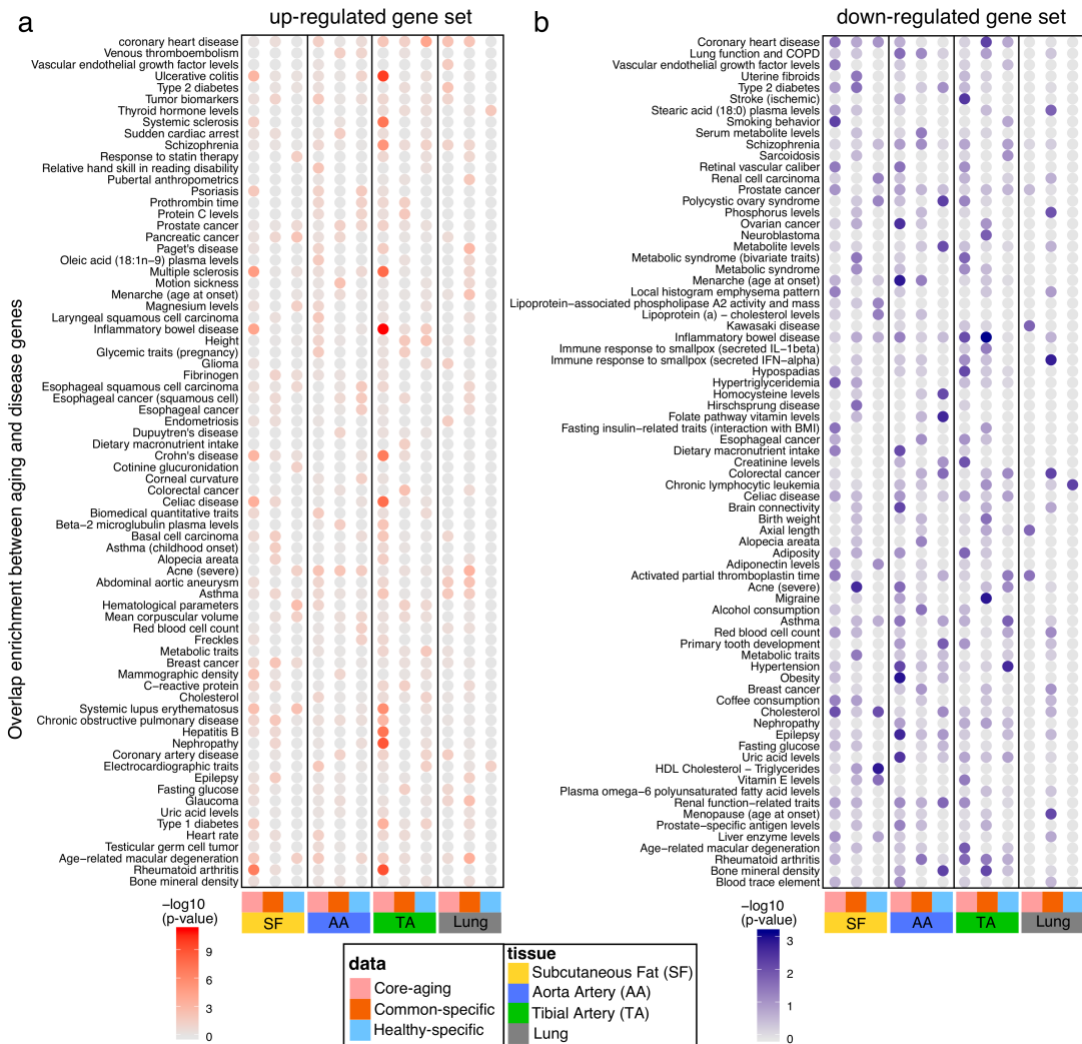

1  
2 **Fig. 4. Enrichment of disease genes in the three types of aging gene sets. A.** The enrichment between up-regulated  
3 aging genes and complex disease genes in three aging gene sets (from left to right: CAGs, CSAGs or HSAGs)  
4 corresponding to four tissues (subcutaneous fat (SF); aorta artery (AA), tibial artery (TA), and Lung). **b** The  
5 enrichment between down-regulated aging genes and complex disease genes in three aging gene sets. Minus log10  
6 transformed p-values were displayed in a color-scale with deeper colors corresponding to more significant p-values.

## 7 Discussion

8 We leveraged GTEx data to study the difference between “healthy” and “common” aging at a transcriptome  
9 level. We constructed two cohorts: one containing individuals without diseases related to the tissue type  
10 under investigation and one containing all individuals regardless of their disease status. We then identified

1 and compared age-associated gene expressions patterns in these cohorts and also compared them with  
2 disease-associated gene expression.

3

4 Our work suggests an intimate intertwined relationship between aging and disease in their gene regulations.

5 We have shown that “healthy” and “common” aging shared a large proportion of genes, suggesting the

6 existence of a core aging program regardless of the individual’s health status. This is not surprising, since

7 our “healthy” cohort was a subset of the “common” aging cohort. For genes whose expression in disease

8 individuals are not dramatically different from the “healthy” aging cohort (particularly for the direction of

9 gene expression regulation), adding these disease individuals to the “healthy” individuals will unlikely

10 change the overall gene expression pattern. In addition, we found our core aging genes were enriched for

11 candidate human age genes recorded in GenAge. Therefore, this core aging program likely reflects the main

12 aging regulation in humans since it is insensitive to the health status of the individuals enrolled for a

13 particular aging study.

14

15 Despite the large overlap between “healthy” and “common” aging genes, HSAGs and CSAGs showed

16 different function enrichment, and CAGs/CSAGs showed higher enrichment for disease genes. For example,

17 CAGs and CSAGs in subcutaneous fat and tibial artery were enriched for genes related to

18 neurodegenerative disease (Supplemental Table S12). It is of note that aging genes in adipose and artery

19 have been reported to be associated with several chronic neurodegenerative diseases (Balistreri et al. 2010;

20 Akinyemi et al. 2013; Parimisetty et al. 2016). Since certain CSAGs become age-associated only when

21 disease individuals are included, their association with age in the “common” cohort is therefore likely

22 driven by diseases.

23

24 Disease associated gene expression regulations are overall different from age-associated genes, supporting

25 that aging and disease are fundamentally distinct and depend on different gene regulations. However,

26 disease associated transcriptome signatures do share some common genes with “healthy” aging signatures.

27 For these shared genes, the direction of gene regulation in “healthy” aging is largely consistent with the

1 regulation direction induced by disease. This suggests that transcriptome regulation in healthy aging could  
2 facilitate the development of disease. For example, even in the “healthy” aging adipose tissues, we observed  
3 elevated inflammation gene expression (e.g., *CDKN2A*, *IL4R*, *TGFB1* and *PTPN22* expression in CAGs,  
4 and *TNFS4F* expression in the HSAGs), and it has been noticed that obesity-associated chronic low-grade  
5 inflammation is responsible for the decrease of insulin sensitivity (Chen et al. 2015), suggesting that age-  
6 associated gene regulation could facilitate the development of certain age-related diseases.

7  
8 In contrast to the “common” aging signatures which were enriched for disease genes, HSAGs (particularly  
9 the up-regulated HSAGs) were less enriched for disease genes and showed different associated functions.  
10 For example, down-regulated CAGs in subcutaneous fat were overrepresented for disease traits like  
11 cholesterol and hypertriglyceridemia; while down-regulated HSAGs were strongly related to HDL  
12 cholesterol-triglycerides (“good” cholesterol). HSAGs also showed strong enrichment for genes related to  
13 ribosome and RNA processing; previous studies have reported that both caloric restriction and rapamycin  
14 treatment extend health/life-span but substantially decrease mRNA levels of ribosomal proteins through  
15 reduced mTOR activity (Frenk and Houseley 2018), therefore that HSAGs may regulate the ribosomal  
16 proteins for the benefit of healthy tissue aging.

17  
18 We speculated that some “healthy-specific” aging genes provide protective mechanisms to prevent the  
19 development of diseases. Using adipose tissue as an example, we found that the top few up-regulated genes  
20 were *KLF4* and *EAF2* (Supplemental S2\_Data). The *EAF2* gene (ELL-associated factor 2) has complex  
21 and overall protective functions in different cell and tissue types. For example, *EAF2* is a key factor  
22 mediating androgen protection of DNA damage via Ku70/Ku80 in prostate cancer cells (Consortium et al.  
23 2017). It may also suppress oxidative stress-induced apoptosis of HLE-B3 cells exerted through the  
24 activation of Wnt3a signaling (Feng and Guo 2018) and protect cells against hypoxia-induced cell death  
25 and inhibit cellular uptake of glucose under hypoxic conditions (Chen et al. 2014). *KLF4* functions as an  
26 immediate-early regulator of adipogenesis specifically induced in response to cAMP (Birsoy et al. 2008),

1 while abiogenesis is known to be reduced in elderly individuals and correlates with the deteriorated  
2 functions of old adipose tissues (Kirkland et al. 2002). It could be an important feature for the healthy aging  
3 program to up-regulate multiple protective genes to strengthen the resilience in these aging tissues.

4  
5 We pointed out that one limitation of our study resides in how we defined a “healthy” aging cohort. It may  
6 be argued that our definition of the “healthy” aging cohort is not truly healthy and better criteria should be  
7 used. Although we fully understand and agree on this point, we are limited by the available samples in the  
8 current GTEx release. When the full version GTEx data become available in near future, we expect to have  
9 a sample size that we can define a healthier “healthy” aging cohort. On the other hand, it has been and will  
10 continue to be difficult to collect tissues from a truly healthy living person as aging is normally accompanied  
11 by various kinds of diseases and only less than 20% of older individuals are considered really healthy.  
12 Previous studies focused on “healthy” aging used peripheral blood samples from a living cohort (Lunnon  
13 et al. 2012; Erikson et al. 2016), or muscle samples from people with good aerobic fitness and free from  
14 metabolic and cardiovascular disease (Sood et al. 2015), or brain regions that were neurologically normal,  
15 but were obtained from donors who died from ischemic heart disease (Ramasamy et al. 2014). Although  
16 specific consideration was taken, most of these studies did not require that samples were from absolutely  
17 healthy individuals. Therefore, we consider it is acceptable to define the “healthy” cohort as donors without  
18 tissue-specific diseases given the resources available to us now, particularly as meaningful results seem to  
19 be obtainable by this approach.

20  
21 In conclusion, we performed a comparative analysis of “healthy” and “common” aging genes based on  
22 transcriptomic data from GTEx. We found “common” aging signatures are comparably more associated  
23 with genes and pathways that cause disorders during aging process, while “healthy” aging is likely to  
24 contain more “good” factors and pathways that engage in boosting the systems resilience in humans. As a  
25 future direction, a useful effort would be to catalog the protective aging gene expression regulations in  
26 details and discover potential interventions to promote the healthy aging program in “common” aging  
27 populations.

## 1 **Methods**

### 2 **Data availability and filters**

3 RNA-seq data (Illumina paired-end, 76bp) and genotyping data from GTEx release V7 were downloaded  
4 from the Database of Genotypes and Phenotypes (dbGaP) under accession phT002742.v2.p1 (see  
5 Supplemental Table S1). Details about the RNA-seq data are provided in the Supplemental Table S2.

6  
7 From the 54 available tissues in the V7, we started by selecting those with at least 80 samples, and samples  
8 with more than 20 million mapping reads and greater than 40% mapping rate. Cell line data were removed  
9 from our analysis, including EBV-transformed lymphocytes, Leukemia cell line (CML), and transformed  
10 fibroblasts. Only genes with expression  $> 0.1$  TPM and aligned read count of 5 or more in more than 80%  
11 of all samples within each tissue were considered significantly expressed and used for aging signature  
12 identification. Expression measurements for each gene in each tissue were subsequently inverse quantile  
13 normalized to a standard normal distribution.

14  
15 Our final dataset included samples from 46 tissue types. The sample size in each tissue ranged from 85 to  
16 491, with an average of 247 samples. The number of genes varied from 14,441 in whole blood to 27,280 in  
17 testis, with a mean of 18,812 genes (Supplemental Fig. S1).

18  
19 **Age and post-mortem interval (PMI) information**

20 Based on GTEx protocol, only donors within 20-70yrs were collected for their project (Supplemental Fig.  
21 S2a). GTEx annotation provides information on three types of ischemic time: Total Ischemic time for a  
22 sample (SMTSISCH), Total Ischemic time for a donor (TRDNISCH) and Ischemic Time (TRISCHD) (time  
23 for the start of the GTEx procedure). Tissue collection was completed within 24hrs of cardiac cessation.  
24 Throughout the text we have used the term Post-Mortem Interval (PMI) to refer to sample ischemic time.  
25 For 13 brain subregions provided by GTEx, only brain cerebellum and brain cortex have sample ischemic  
26 time information. In those cases, we used donor ischemic time for the rest of the brain subregions, and they



1 are marked with specific notations. Negative PMI values observed in whole-blood samples were  
2 transformed to 0 in the regression analysis (Supplemental Fig. S2b,c).

3

#### 4 **PMI correction**

5 In order to assess the impact of PMI on age-associated gene expression changes, regression models with or  
6 without PMI as confounding factors were applied. First, we considered a set of covariates (age, gender, top  
7 3 genotypes, gene expression PC and RIN). Then, for each gene we implemented a linear regression model  
8 where the gene expression was modeled with relation to the covariates (equation 1). Next, the correlation  
9 between the residuals and the age was calculated,  $r = \text{correlation}(\text{gene\_expression.resid}, \text{age.vals})$ . The  
10 corresponding correlation and p-values (adjusted with BH (Benjamini and Hochberg 1995) method) were  
11 then calculated for all genes; only FDR value  $< 0.01$  were considered as age-associated genes. This  
12 procedure was repeated, except by correcting PMI as an extra confounding variate (equation 2).

$$13 \quad Y_{ij} = \beta_j + \gamma_j \text{Age}_i + \delta_j \text{Sex}_i + \sum_{k=1}^3 \mu_{jk} \text{Genotype}_{ik} + \sum_{k=1}^N \alpha_{jk} \text{PC}_{ik} + \theta_j \text{RIN}_i + \varepsilon_{ij} \quad (\text{equation 1})$$

$$14 \quad Y_{ij} = \beta_j + \gamma_j \text{Age}_i + \delta_j \text{Sex}_i + \sum_{k=1}^3 \mu_{jk} \text{Genotype}_{ik} + \sum_{k=1}^N \alpha_{jk} \text{PC}_{ik} + \theta_j \text{RIN}_i + (\delta_j \text{PMI}_i) + \varepsilon_{ij}$$

15 (equation 2)

16 In both models,  $Y_{ij}$  is the expression level of gene  $j$  in sample  $i$ ,  $\text{Age}_i$  denotes the donor age of sample  $i$ ,  
17  $\text{Sex}_i$  denotes the sex of donor for sample  $i$ ,  $\text{Genotype}_{ik} (k \in (1,2,3))$  denotes the value of  $k$ -th principal  
18 component value of genotype profile for the  $i$ -th sample,  $\text{PC}_{ik} (k \in (1, \dots, N))$  denotes the value of  $k$ -th  
19 principal component value of gene expression profile for the  $i$ -th sample,  $N$  is the total number of top PCs  
20 under consideration,  $\text{RIN}_i$  denotes the RIN score of sample  $i$ ,  $\text{PMI}_i$  denotes the PMI of sample  $i$ , which was  
21 considered as an extra covariates in the second regression model (equation 2),  $\varepsilon_{ij}$  is the error term,  $\gamma_j$ ,  $\delta_j$ ,  
22  $\mu_{jk}$ ,  $\delta_j$ , is the regression coefficient for each variates. For each gene  $j$ , a least square approach was used to  
23 estimate the regression coefficients. If  $\gamma_j$  was significantly deviated from 0, gene  $j$  was then considered to  
24 be an age-associated gene. Gene  $j$  with  $\gamma_j > 0$  was considered as up-regulated with age, gene  $j$  with  $\gamma_j < 0$   
25 was considered as down-regulated with age.

## 1 **Differential expression between the “disease” and “healthy” individuals**

2 For differentially expression analysis we used the statistical methods implemented in the limma-voom  
3 (Ritchie et al. 2015) package. We started by building a matrix with gene read counts in donors with tissue-  
4 specific diseases and donors without tissue-specific diseases (Supplemental Table S7). Genes are kept if  
5 they are expressed in at least two samples. We created a design matrix taking into account 2 conditions (e.g.  
6 “disease” cohort and “healthy” cohort) and several covariates:

$$7 \quad \text{Design} = \text{model.matrix}(\sim \text{condition} + \text{GENDER} + \text{AGE} + \text{SMRIN} + \text{SMTSISCH}$$
$$8 \quad + \sum_{k=1}^3 \mu_{jk} \text{Genotype}_{ik})$$

9 Condition and gender were converted as factors, type of nucleic acid isolation batch (SMNABTCHT) was  
10 implemented as batch. The corresponding correlation and p-values (adjusted with BH) were then calculated  
11 for all genes, only results with FDR value < 0.05 were considered as significant DEGs.

12

## 13 **Functional annotation for GTEx aging signatures**

14 To demonstrate the potential functional significance of aging signatures, DAVID tool (Dennis et al. 2003)  
15 was used to perform GO classification. We first extracted gene symbols from each age-associated gene sets:  
16 “common-specific aging genes, “core-aging genes” and “healthy-specific aging genes. These gene lists  
17 were then submitted to DAVID by choosing GO\_FAT and KEGG pathway terms to describe the  
18 overrepresented functional terms for them. The threshold for overrepresented GO terms was set to FDR  
19 less than 0.05.

20

## 21 **Assembly of disease gene list and identify significant overlap between disease and aging genes**

22 Disease genes were retrieved from two sources: NIH Genome-Wide Association Studies (GWAS) Catalog  
23 and OMIM (Online Mendelian Inheritance in Man). We only considered genes in the GWAS catalog with  
24 p-value <  $5 \times 10^{-8}$ , a widely accepted threshold for genome-wide significance. Clustering and manual  
25 curation were used to merge genes in GWAS and OMIM. We only considered disease categories which

1 contained with at least 5 genes. We then performed a Hypergeometric based test between the disease genes  
2 and three age-associated gene sets in four tissues. Aging genes with  $FDR \leq 0.01$  were used for testing age-  
3 disease overlap enrichment (p-values less than 0.01 were considered significant). In addition, we separated  
4 each gene set into up and down-regulated with age. To visualize the result, we selected the top 10 most  
5 significant diseases in each tissue, which resulted in 75 unique diseases for down-regulated and 74 unique  
6 diseases for up-regulated age-associated genes. P-value was then  $-\log_{10}$  transformed and plotted in Fig. 4.

7

## 8 **Data access**

9 The GTEx analysis V7 genotype, phenotype and gene expression data were downloaded from GTEx portal:  
10 <https://gtexportal.org/home/>, and dbGaP accession phs000424.v7.p2.

## 11 **Acknowledgments**

12 This work was funded by NIH grant R01AG055501 to Z.T. and Y.S. We wish to acknowledge all GTEx  
13 donors for their generous tissue donation and GTEx consortium for data curation. This work was supported  
14 in part through the computational resources and staff expertise provided by Scientific Computing at the  
15 Icahn School of Medicine at Mount Sinai.

16

## 17 **Author contributions**

18 Z.T. conceived and designed the project; L.Z. performed the analysis; L.Z. and Z.T. wrote the paper; J.Y.,  
19 S.P., J.Z., B.Z., and Y.S. contributed to the discussion of the results and helped revise the paper. All  
20 authors reviewed the work and agreed for its publication.

## 21 **Disclosure declaration**

22 The authors declare no competing financial interests.

23

## 1 **References**

- 2 Ai J, Pascal LE, Wei L, Zang Y, Zhou Y, Yu X, Gong Y, Nakajima S, Nelson JB, Levine AS et al. 2017.  
3 EAF2 regulates DNA repair through Ku70/Ku80 in the prostate. *Oncogene* **36**(15): 2054-  
4 2065.
- 5 Akinyemi RO, Mukaetova-Ladinska EB, Attems J, Ihara M, Kalaria RN. 2013. Vascular risk factors  
6 and neurodegeneration in ageing related dementias: Alzheimer's disease and vascular  
7 dementia. *Curr Alzheimer Res* **10**(6): 642-653.
- 8 Amberger JS, Bocchini CA, Schiettecatte F, Scott AF, Hamosh A. 2015. OMIM.org: Online  
9 Mendelian Inheritance in Man (OMIM(R)), an online catalog of human genes and genetic  
10 disorders. *Nucleic Acids Res* **43**(Database issue): D789-798.
- 11 Balistreri CR, Caruso C, Candore G. 2010. The role of adipose tissue and adipokines in obesity-  
12 related inflammatory diseases. *Mediators Inflamm* **2010**: 802078.
- 13 Benayoun BAA, Pollina EA, Singh PP, Mahmoudi S, Harel I, Casey KM, Dulken BW, Kundaje A,  
14 Brunet A. 2019. Remodeling of epigenome and transcriptome landscapes with aging in  
15 mice reveals widespread induction of inflammatory responses. *Genome research* **29**(4):  
16 697-709.
- 17 Benjamini Y, Hochberg Y. 1995. Controlling the False Discovery Rate - a Practical and Powerful  
18 Approach to Multiple Testing. *Journal of the Royal Statistical Society Series B-Statistical*  
19 *Methodology* **57**(1): 289-300.
- 20 Berchtold NC, Cribbs DH, Coleman PD, Rogers J, Head E, Kim R, Beach T, Miller C, Troncoso J,  
21 Trojanowski JQ et al. 2008. Gene expression changes in the course of normal brain aging  
22 are sexually dimorphic. *Proc Natl Acad Sci U S A* **105**(40): 15605-15610.
- 23 Bergman A, Atzmon G, Ye K, MacCarthy T, Barzilai N. 2007. Buffering mechanisms in aging: a  
24 systems approach toward uncovering the genetic component of aging. *PLoS*  
25 *computational biology* **3**(8).
- 26 Birsoy K, Chen Z, Friedman J. 2008. Transcriptional regulation of adipogenesis by KLF4. *Cell*  
27 *metabolism* **7**(4): 339-347.
- 28 Brooks-Wilson AR. 2013. Genetics of healthy aging and longevity. *Human genetics* **132**(12): 1323-  
29 1338.
- 30 Burch JB, Augustine AD, Frieden LA, Hadley E, Howcroft TK, Johnson R, Khalsa PS, Kohanski RA, Li  
31 XL, Macchiarini F et al. 2014. Advances in geroscience: impact on healthspan and chronic  
32 disease. *The journals of gerontology Series A, Biological sciences and medical sciences* **69**  
33 **Suppl 1**: 3.
- 34 CDC. 2011. Healthy aging: Helping people to live long and productive lives and enjoy a good  
35 quality of life: At a glance 2011.
- 36 Chen J, Mo R, Lescure PA, Misek DE, Hanash S, Rochford R, Hobbs M, Yung RL. 2003. Aging is  
37 associated with increased T-cell chemokine expression in C57BL/6 mice. *J Gerontol A Biol*  
38 *Sci Med Sci* **58**(11): 975-983.

- 1 Chen L, Chen R, Wang H, Liang F. 2015. Mechanisms Linking Inflammation to Insulin Resistance.  
2 *International journal of endocrinology* **2015**: 508409.
- 3 Chen Z, Liu X, Mei Z, Wang Z, Xiao W. 2014. EAF2 suppresses hypoxia-induced factor 1 $\alpha$   
4 transcriptional activity by disrupting its interaction with coactivator CBP/p300. *Molecular*  
5 *and cellular biology* **34**(6): 1085-1099.
- 6 Christensen K, Doblhammer G, Rau R, Vaupel JW. 2009. Ageing populations: the challenges ahead.  
7 *The Lancet* **374**(9696): 1196-1208.
- 8 Consortium GT, Laboratory DA, Coordinating Center -Analysis Working G, Statistical Methods  
9 groups-Analysis Working G, Enhancing Gg, Fund NIHC, Nih/Nci, Nih/Nhgri, Nih/Nimh,  
10 Nih/Nida et al. 2017. Genetic effects on gene expression across human tissues. *Nature*  
11 **550**(7675): 204-213.
- 12 Coppé J-PP, Rodier F, Patil CK, Freund A, Desprez P-YY, Campisi J. 2011. Tumor suppressor and  
13 aging biomarker p16(INK4a) induces cellular senescence without the associated  
14 inflammatory secretory phenotype. *The Journal of biological chemistry* **286**(42): 36396-  
15 36403.
- 16 Cui H, Kong Y, Zhang H. 2012. Oxidative stress, mitochondrial dysfunction, and aging. *J Signal*  
17 *Transduct* **2012**: 646354.
- 18 de Magalhaes JP, Toussaint O. 2004. GenAge: a genomic and proteomic network map of human  
19 ageing. *FEBS Lett* **571**(1-3): 243-247.
- 20 de Vries M, Faiz A, Woldhuis RR, Postma DS, de Jong TV, Sin DD, Bosse Y, Nickle DC, Guryev V,  
21 Timens W et al. 2017. Lung tissue gene-expression signature for the ageing lung in COPD.  
22 *Thorax*.
- 23 Dennis G, Jr., Sherman BT, Hosack DA, Yang J, Gao W, Lane HC, Lempicki RA. 2003. DAVID:  
24 Database for Annotation, Visualization, and Integrated Discovery. *Genome Biol* **4**(5): P3.
- 25 Edwards MG, Anderson RM, Yuan M, Kendziorowski CM, Weindruch R, Prolla TA. 2007. Gene  
26 expression profiling of aging reveals activation of a p53-mediated transcriptional program.  
27 *BMC Genomics* **8**: 80.
- 28 Erikson GA, Bodian DL, Rueda M, Molparia B, Scott ER, Scott-Van Zeeland AA, Topol SE, Wineinger  
29 NE, Niederhuber JE, Topol EJ et al. 2016. Whole-Genome Sequencing of a Healthy Aging  
30 Cohort. *Cell* **165**(4): 1002-1011.
- 31 Feng K, Guo H-KK. 2018. Eaf2 protects human lens epithelial cells against oxidative stress-induced  
32 apoptosis by Wnt signaling. *Molecular medicine reports* **17**(2): 2795-2802.
- 33 Ferreira PG, Munoz-Aguirre M, Reverter F, Sa Godinho CP, Sousa A, Amadoz A, Sodaei R, Hidalgo  
34 MR, Pervouchine D, Carbonell-Caballero J et al. 2018. The effects of death and post-  
35 mortem cold ischemia on human tissue transcriptomes. *Nat Commun* **9**(1): 490.
- 36 Font-Clos F, Zapperi S, La Porta CAM. 2017. Integrative analysis of pathway deregulation in  
37 obesity. *NPJ Syst Biol Appl* **3**: 18.
- 38 Frenk S, Houseley J. 2018. Gene expression hallmarks of cellular ageing. *Biogerontology* **19**(6):  
39 547-566.

- 1 Glass D, Vinuela A, Davies MN, Ramasamy A, Parts L, Knowles D, Brown AA, Hedman AK, Small  
2 KS, Buil A et al. 2013. Gene expression changes with age in skin, adipose tissue, blood and  
3 brain. *Genome Biol* **14**(7): R75.
- 4 Global Burden of Disease Study C. 2015. Global, regional, and national incidence, prevalence, and  
5 years lived with disability for 301 acute and chronic diseases and injuries in 188 countries,  
6 1990-2013: a systematic analysis for the Global Burden of Disease Study 2013. *Lancet*  
7 **386**(9995): 743-800.
- 8 Horvath S, Raj K. 2018. DNA methylation-based biomarkers and the epigenetic clock theory of  
9 ageing. *Nature reviews Genetics* **19**(6): 371-384.
- 10 Joehanes R, Ying S, Huan T, Johnson AD, Raghavachari N, Wang R, Liu P, Woodhouse KA, Sen SK,  
11 Tanriverdi K et al. 2013. Gene expression signatures of coronary heart disease.  
12 *Arterioscler Thromb Vasc Biol* **33**(6): 1418-1426.
- 13 Johnson SC, Dong X, Vijg J, Suh Y. 2015. Genetic evidence for common pathways in human age-  
14 related diseases. *Aging Cell* **14**(5): 809-817.
- 15 Kheirbek RE, Fokar A, Shara N, Bell-Wilson LK, Moore HJ, Olsen E, Blackman MR, Llorente MD.  
16 2017. Characteristics and Incidence of Chronic Illness in Community-Dwelling  
17 Predominantly Male U.S. Veteran Centenarians. *Journal of the American Geriatrics Society*  
18 **65**(9): 2100-2106.
- 19 Kirkland JL, Tchkonja T, Pirtskhalava T, Han J, Karagiannides I. 2002. Adipogenesis and aging: does  
20 aging make fat go MAD? *Experimental gerontology* **37**(6): 757-767.
- 21 Krishnamurthy J, Torrice C, Ramsey MR, Kovalev GI, Al-Regaiey K, Su L, Sharpless NE. 2004.  
22 Ink4a/Arf expression is a biomarker of aging. *J Clin Invest* **114**(9): 1299-1307.
- 23 Lu AT, Xue L, Salfati EL, Chen BH, Ferrucci L, Levy D, Joehanes R, Murabito JM, Kiel DP, Tsai PC et  
24 al. 2018. GWAS of epigenetic aging rates in blood reveals a critical role for TERT. *Nat*  
25 *Commun* **9**(1): 387.
- 26 Lunnon K, Ibrahim Z, Proitsi P, Lourdasamy A, Newhouse S, Sattlecker M, Furney S, Saleem M,  
27 Soininen H, Kloszewska I et al. 2012. Mitochondrial Dysfunction and Immune Activation  
28 are Detectable in Early Alzheimer's Disease Blood. *Journal of Alzheimers Disease* **30**(3):  
29 685-710.
- 30 Ma J, Dempsey AA, Stamatiou D, Marshall KW, Liew CC. 2007. Identifying leukocyte gene  
31 expression patterns associated with plasma lipid levels in human subjects. *Atherosclerosis*  
32 **191**(1): 63-72.
- 33 Ma S, Avanesov AS, Porter E, Lee BC, Mariotti M, Zemskaaya N, Guigo R, Moskalev AA, Gladyshev  
34 VN. 2018. Comparative transcriptomics across 14 Drosophila species reveals signatures of  
35 longevity. *Aging cell* **17**(4).
- 36 Parimisetty A, Dorsemans AC, Awada R, Ravanani P, Diotel N, Lefebvre d'Hellencourt C. 2016.  
37 Secret talk between adipose tissue and central nervous system via secreted factors-an  
38 emerging frontier in the neurodegenerative research. *J Neuroinflammation* **13**(1): 67.

- 1 Peters MJ, Joehanes R, Pilling LC, Schurmann C, Conneely KN, Powell J, Reinmaa E, Sutphin GL  
2 Zhernakova A, Schramm K et al. 2015. The transcriptional landscape of age in human  
3 peripheral blood. *Nat Commun* **6**: 8570.
- 4 Ramasamy A, Tratzuni D, Guelfi S, Varghese V, Smith C, Walker R, De T, Consortium UKBE, North  
5 American Brain Expression C, Coin L et al. 2014. Genetic variability in the regulation of  
6 gene expression in ten regions of the human brain. *Nat Neurosci* **17**(10): 1418-1428.
- 7 Ritchie ME, Phipson B, Wu D, Hu Y, Law CW, Shi W, Smyth GK. 2015. limma powers differential  
8 expression analyses for RNA-sequencing and microarray studies. *Nucleic Acids Res* **43**(7):  
9 e47.
- 10 Sood S, Gallagher IJ, Lunnon K, Rullman E, Keohane A, Crossland H, Phillips BE, Cederholm T,  
11 Jensen T, van Loon LJ et al. 2015. A novel multi-tissue RNA diagnostic of healthy ageing  
12 relates to cognitive health status. *Genome Biol* **16**: 185.
- 13 Soronen J, Laurila PP, Naukkarinen J, Surakka I, Ripatti S, Jauhiainen M, Olkkonen VM, Yki-  
14 Jarvinen H. 2012. Adipose tissue gene expression analysis reveals changes in  
15 inflammatory, mitochondrial respiratory and lipid metabolic pathways in obese insulin-  
16 resistant subjects. *BMC Med Genomics* **5**: 9.
- 17 Wang IM, Stepaniants S, Boie Y, Mortimer JR, Kennedy B, Elliott M, Hayashi S, Loy L, Coulter S,  
18 Cervino S et al. 2008. Gene expression profiling in patients with chronic obstructive  
19 pulmonary disease and lung cancer. *Am J Respir Crit Care Med* **177**(4): 402-411.
- 20 Welter D, MacArthur J, Morales J, Burdett T, Hall P, Junkins H, Klemm A, Flicek P, Manolio T,  
21 Hindorff L et al. 2014. The NHGRI GWAS Catalog, a curated resource of SNP-trait  
22 associations. *Nucleic Acids Res* **42**(Database issue): D1001-1006.
- 23 Wiklund P, Zhang X, Pekkala S, Autio R, Kong L, Yang Y, Keinänen-Kiukaanniemi S, Alen M, Cheng  
24 S. 2016. Insulin resistance is associated with altered amino acid metabolism and adipose  
25 tissue dysfunction in normoglycemic women. *Sci Rep* **6**: 24540.
- 26 Wu H, Perrard XD, Wang Q, Perrard JL, Polsani VR, Jones PH, Smith CW, Ballantyne CM. 2010.  
27 CD11c expression in adipose tissue and blood and its role in diet-induced obesity.  
28 *Arterioscler Thromb Vasc Biol* **30**(2): 186-192.
- 29 Yang J, Huang T, Petralia F, Long Q, Zhang B, Argmann C, Zhao Y, Mobbs CV, Schadt EE, Zhu J et  
30 al. 2015. Synchronized age-related gene expression changes across multiple tissues in  
31 human and the link to complex diseases. *Sci Rep* **5**: 15145.
- 32 Yashin AI, Arbeevev KG, Wu D, Arbeevev LS, Bagley O, Stallard E, Kulminski AM, Akushevich I, Fang  
33 F, Wojczynski MK et al. 2018. Genetics of Human Longevity From Incomplete Data: New  
34 Findings From the Long Life Family Study. *The journals of gerontology Series A, Biological*  
35 *sciences and medical sciences* **73**(11): 1472-1481.
- 36
